# Supplementary material
Source: publisher site journal article supplement (https://www.spandidos-publications.com/3789/downloadSupplementary)
Supplement: Supplementary file 1 [file downloadSupplementary]

Table SI. Prescribed treatment regimens for *Helicobacter pylori* eradication.

| A, Triple therapy     |        |            |                |                      |
|-----------------------|--------|------------|----------------|----------------------|
| Drug                  | Dose   | Frequency  | Duration, days | Initiation           |
| Amoxicillin           | 1 g    | Every 12 h | 7              |                      |
| Clarithromycin        | 500 mg | Every 12 h | 7              |                      |
| Lansoprazole          | 30 mg  | Every 12 h | 14             |                      |
|                       |        | Every 24 h | 14             |                      |
| B, Sequential therapy |        |            |                |                      |
| Drug                  | Dose   | Frequency  | Duration, days | Initiation           |
| Amoxicillin           | 1 g    | Every 12 h | 7              | Week 1               |
| Bismuth               | 440 mg | Every 12 h | 21             | Starting from week 1 |
| Lansoprazole          | 30 mg  | Every 12 h | 14             |                      |
|                       |        | Every 24 h | 14             |                      |
| Clarithromycin        | 500 mg | Every 12 h | 7              | Week 2               |
| Metronidazole         | 500 mg | Every 12 h | 7              |                      |
